# Supplementary material for: Toward sustainability: Integrating experimental study and data-driven modeling for eco-friendly paver blocks containing plastic waste
Source: publisher site journal article supplement (doi:10.1515/rams-2024-0051), 2024-01-01
Supplement: Supplementary file 1 [file rams-2024-0051_sm.xlsx]

## Sheet: Sheet1
Sand	Plastic	Fiber	Sand_S	Fiber_L	Actual CS	Predicted CS
kg/m3	kg/m4	kg/m5	mm	mm	Mpa	Mpa
1425	475	0	0.42	0	16.5133	16.1758
1425	475	0	0.42	0	17.33	17.6067
1425	475	0	0.42	0	17.89	17.6067
1425	475	0	0.42	0	15	14.56
1425	475	0	0.42	0	13.89	13.56
1425	475	0	0.42	0	16.153	16.1758
1425	475	0	0.59	0	15.34	15.055
1425	475	0	0.59	0	17.55	17.6067
1425	475	0	0.59	0	17.04	17
1425	475	0	0.59	0	16.1	16.1758
1425	475	0	0.59	0	14.04	14.1743
1425	475	0	0.59	0	19.6	20.26
1425	475	0	1.69	0	16.23	16.1758
1425	475	0	1.69	0	15.45	15.055
1425	475	0	1.69	0	15.84	14.1743
1425	475	0	1.69	0	14.33	15.8614
1425	475	0	1.69	0	21.12	20.26
1425	475	0	1.69	0	14.78	15.105
1615	285	0	0.42	0	14.69	14.657
1615	285	0	0.42	0	12.1	12.342
1615	285	0	0.42	0	18.52	18.176
1615	285	0	0.42	0	18.56	18.176
1615	285	0	0.42	0	14.68	13.3711
1615	285	0	0.42	0	14.2	14.1743
1520	380	0	0.42	0	15.68	15.105
1520	380	0	0.42	0	11.96	11.896
1520	380	0	0.42	0	12.71	12.645
1520	380	0	0.42	0	15.98	15.9988
1520	380	0	0.42	0	14.5	13.3711
1520	380	0	0.42	0	15.87	16.1758
1425	475	0	0.42	0	13.63	14.1743
1425	475	0	0.42	0	16.9	15.8614
1425	475	0	0.42	0	18.4	18.176
1425	475	0	0.42	0	14	14.1743
1425	475	0	0.42	0	19.32	18.4788
1425	475	0	0.42	0	20.64	20.26
1330	570	0	0.42	0	14.98	15.105
1330	570	0	0.42	0	14.65	15.055
1330	570	0	0.42	0	12.21	11.896
1330	570	0	0.42	0	18.43	18.4788
1330	570	0	0.42	0	13.76	15.8614
1330	570	0	0.42	0	19	18.4788
1235	665	0	0.42	0	17.43	17.6067
1235	665	0	0.42	0	16.65	15.9988
1235	665	0	0.42	0	14.34	15.105
1235	665	0	0.42	0	17.89	15.8614
1235	665	0	0.42	0	14.67	15.055
1235	665	0	0.42	0	12.44	11.896
1140	760	0	0.42	0	18.05	20.26
1140	760	0	0.42	0	15.22	15.055
1140	760	0	0.42	0	18.55	18.4788
1140	760	0	0.42	0	16.5	16.1758
1140	760	0	0.42	0	16.054	15.9988
1140	760	0	0.42	0	15	15.055
1330	570	0.627	0.42	4	18.01	17.6067
1330	570	0.627	0.42	4	18.2	18.176
1330	570	0.627	0.42	4	17.22	15.8614
1330	570	0.627	0.42	4	14.76	13.3711
1330	570	0.627	0.42	4	20.08	20.26
1330	570	0.627	0.42	4	15.84	16.1758
1330	570	1.71	0.42	4	11.33	11.896
1330	570	1.71	0.42	4	11	13.3711
1330	570	1.71	0.42	4	16.2	16.1758
1330	570	1.71	0.42	4	11.65	13.3711
1330	570	1.71	0.42	4	19.9	20.26
1330	570	1.71	0.42	4	15.5	15.105
1330	570	2.85	0.42	4	18.3	18.4788
1330	570	2.85	0.42	4	18.65	18.4788
1330	570	2.85	0.42	4	15.35	15.105
1330	570	2.85	0.42	4	15.77	15.9988
1330	570	2.85	0.42	4	15.54	15.9988
1330	570	2.85	0.42	4	11.96	13.3711
1330	570	3.99	0.42	4	17.43	17.6067
1330	570	3.99	0.42	4	22.43	20.26
1330	570	3.99	0.42	4	17.8	18.4788
1330	570	3.99	0.42	4	14.8	14.1743
1330	570	3.99	0.42	4	17.2	18.176
1330	570	3.99	0.42	4	11.54	11.896
1330	570	5.7	0.42	4	17.78	18.4788
1330	570	5.7	0.42	4	16.32	15.9988
1330	570	5.7	0.42	4	15.54	16.1758
1330	570	5.7	0.42	4	17.55	15.8614
1330	570	5.7	0.42	4	21.67	20.26
1330	570	5.7	0.42	4	15.54	14.1743
1330	570	0.627	0.42	12	14	15.8614
1330	570	0.627	0.42	12	22.01	20.26
1330	570	0.627	0.42	12	21.34	20.26
1330	570	0.627	0.42	12	13.45	15.8614
1330	570	0.627	0.42	12	14.13	14.1743
1330	570	0.627	0.42	12	19.4	20.26
1330	570	1.71	0.42	12	17	15.8614
1330	570	1.71	0.42	12	16.2	15.9988
1330	570	1.71	0.42	12	15.78	15.9988
1330	570	1.71	0.42	12	12.3	13.3711
1330	570	1.71	0.42	12	16	16.1758
1330	570	1.71	0.42	12	18.54	18.4788
1330	570	2.85	0.42	12	14.89	14.5
1330	570	2.85	0.42	12	15.965	15.9988
1330	570	2.85	0.42	12	12.2	11.896
1330	570	2.85	0.42	12	17.98	18.4788
1330	570	2.85	0.42	12	19.5	18.176
1330	570	2.85	0.42	12	13.9	14.1743
1330	570	3.99	0.42	12	16.44	16.1758
1330	570	3.99	0.42	12	21.33	20.26
1330	570	3.99	0.42	12	16.055	15.9988
1330	570	3.99	0.42	12	15.98	15.9988
1330	570	3.99	0.42	12	11.33	12
1330	570	3.99	0.42	12	14.32	15.8614
1330	570	5.7	0.42	12	17.9	18.4788
1330	570	5.7	0.42	12	16.54	15.9988
1330	570	5.7	0.42	12	13.8033	14.1743
1330	570	5.7	0.42	12	16.6	16.1758
1330	570	5.7	0.42	12	18.05	18.4788
1330	570	5.7	0.42	12	15.87	15.567
